# Supplementary material for: BMP4 drives primed to naïve transition through PGC-like state
Source: PubMed Central journal article supplement (PMC9120449; doi:10.1038/s41467-022-30325-4), 2022-05-19
Supplement: 41467_2022_30325_MOESM1_ESM.pdf [file 41467_2022_30325_MOESM1_ESM.pdf]

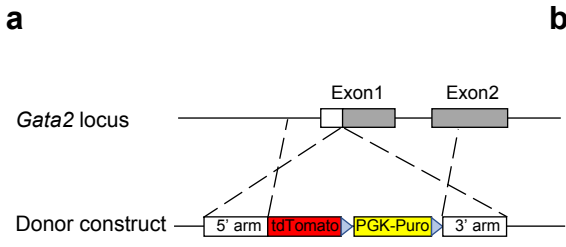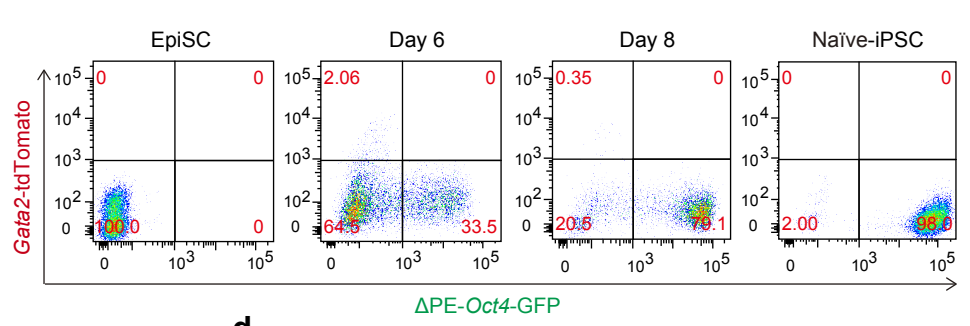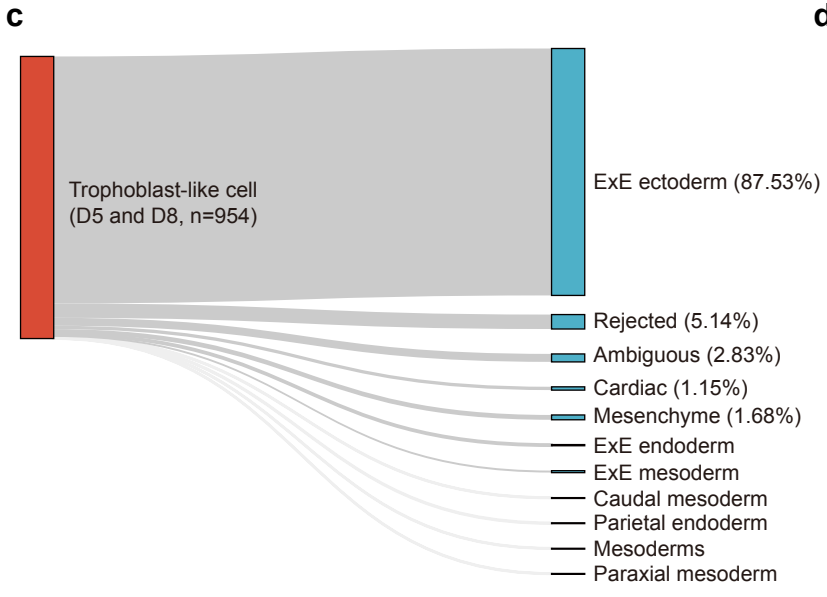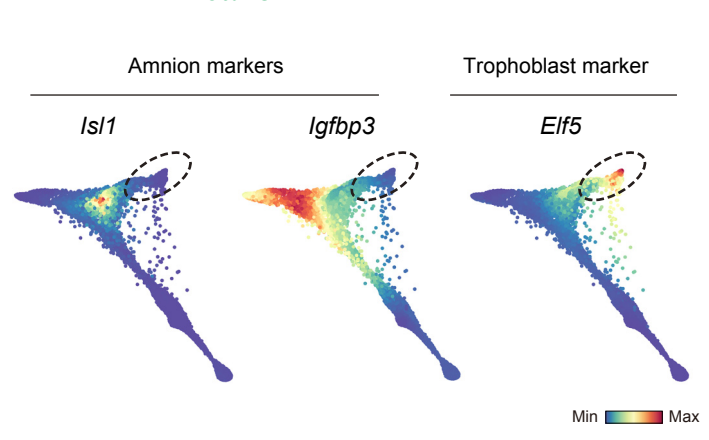

**Supplementary Fig. 1 Generation of trophoblast-like cells during BiPNT.** **a** Targeting strategy of generating *Gata2*-tdTomato knock-in reporter EpiSCs. **b** FACS analysis of  $\Delta$ PE-*Oct4*-GFP or *Gata2*-tdTomato positive cells during BiPNT. Data shown are from 1 of 3 independent experiments. **c** Sankey plot comparing the trophoblast-like cells with the reference mouse gastrulation single-cell dataset from Pijuan-Sala, et al., Nature, 2019. **d** Plots showing the expression patterns of amnion markers *Isl1*, *Igfbp3* and trophoblast marker *Elf5* during BiPNT. *Elf5* positive trophoblast-like cells were highlighted by black dotted line.

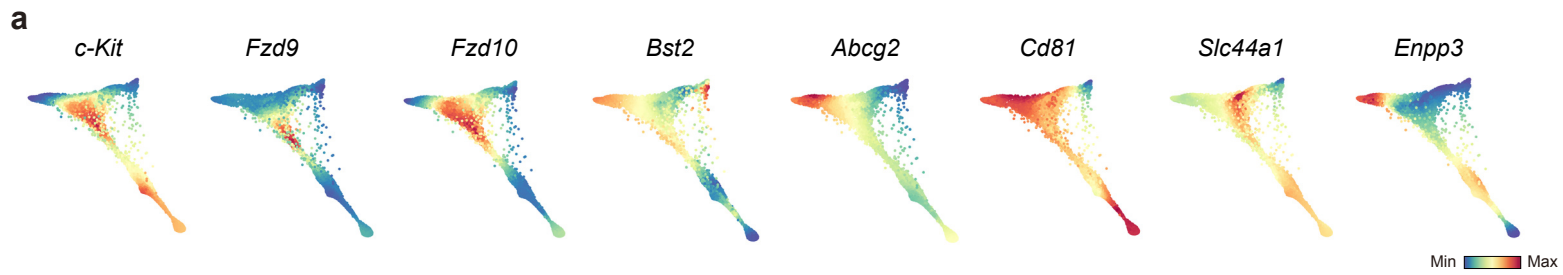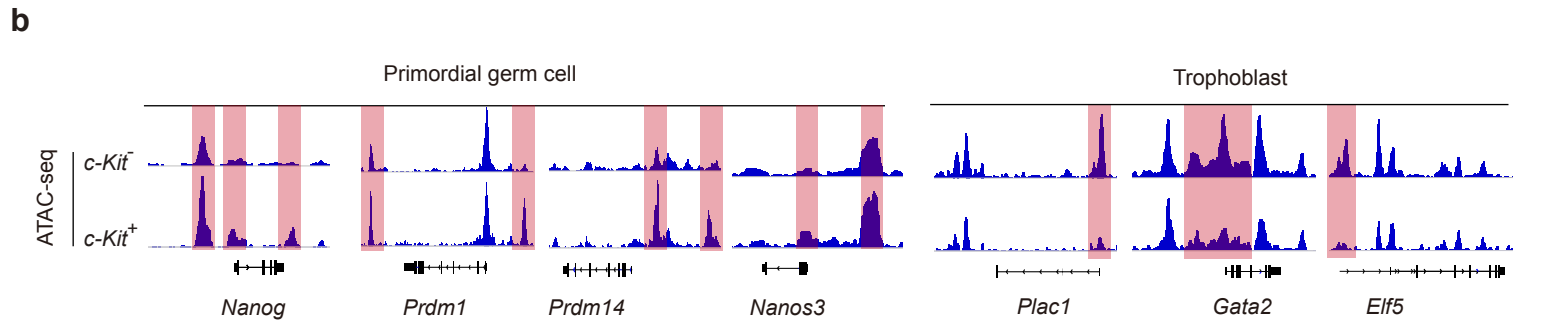

**Supplementary Fig. 2 Cell surface marker *c-Kit* indicates the early naïve branch.** **a** Candidates of cell surface markers for naïve branch. **b** Representative loci for ATAC-seq peaks in *c-Kit* positive and negative cell samples at Day 3 of BiPNT.

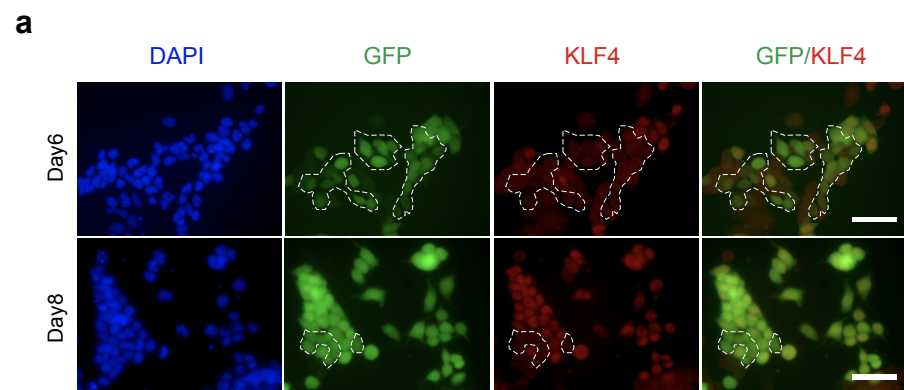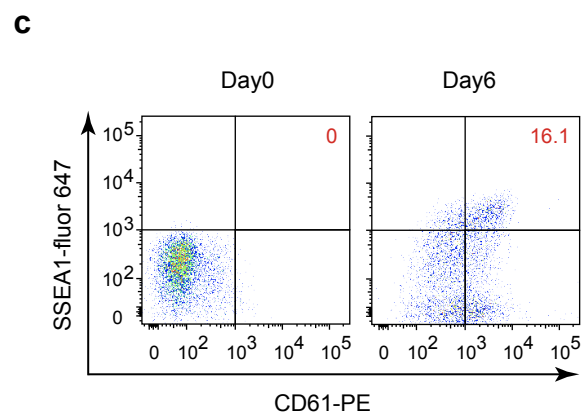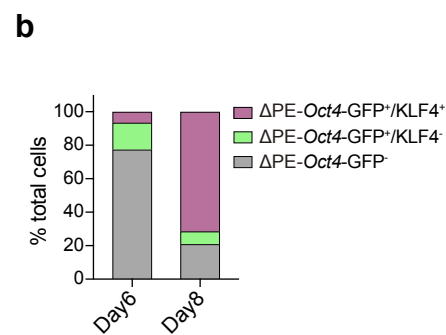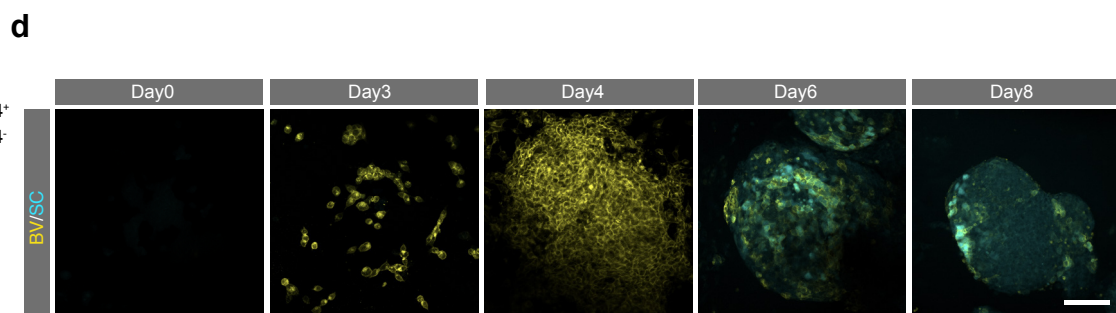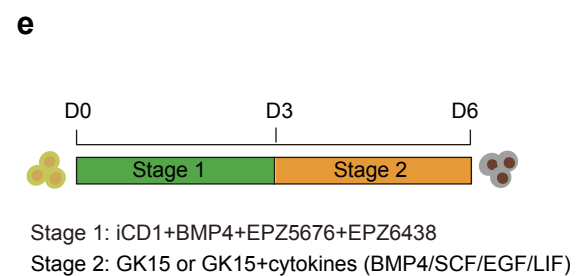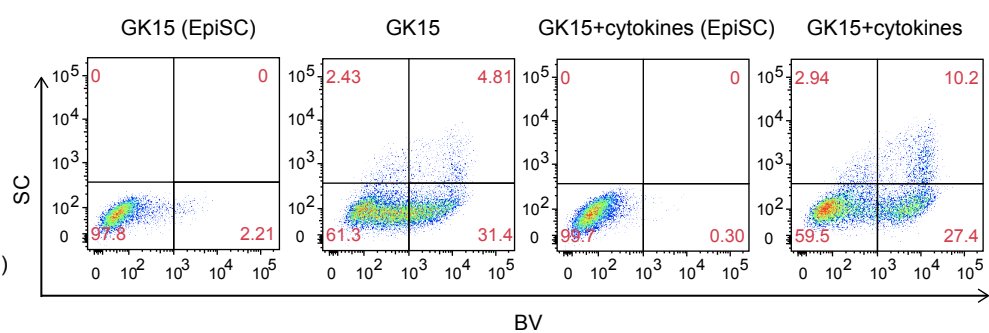

**Supplementary Fig. 3 Activation of PGC program during the naïve branch.** **a** Immunofluorescence analysis of KLF4 in  $\Delta$ PE-*Oct4*-GFP positive cells at Day 6 and 8 of BiPNT. Scale bars, 50  $\mu$ m. **b** Percentage of indicated cells at Day 6 and 8 of BiPNT. **c** FACS analysis for surface markers SSEA1 and CD61 in Day 6 cells of BiPNT. **d** Representative images of BV or SC cells during BiPNT. Scale bars, 50  $\mu$ m. The experiments were repeated independently three times with similar results. **e** Left: schematic of experimental approach. Right: FACS analysis of BVSC induction at Day 6 when stage 2 medium was changed to GK15 (GMEM+15% KSR) medium with or without cytokines (BMP4, EGF, SCF and LIF). EpiSC cultured in GK15 medium with or without cytokines for 3 days was as control. Source data are provided as a Source Data file.

**a**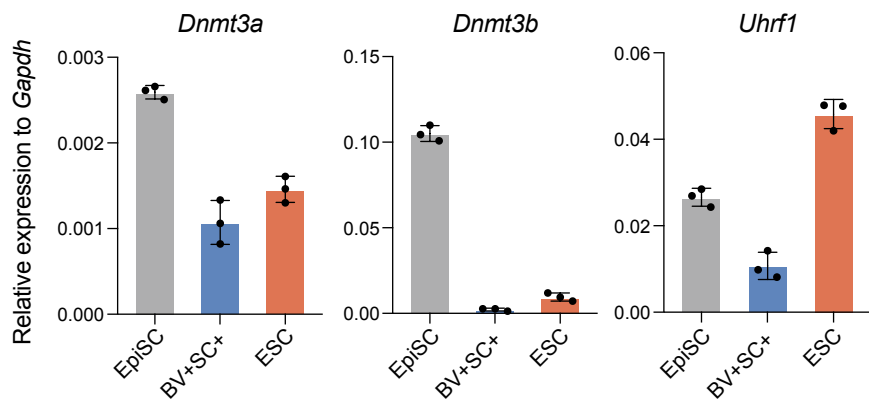**b**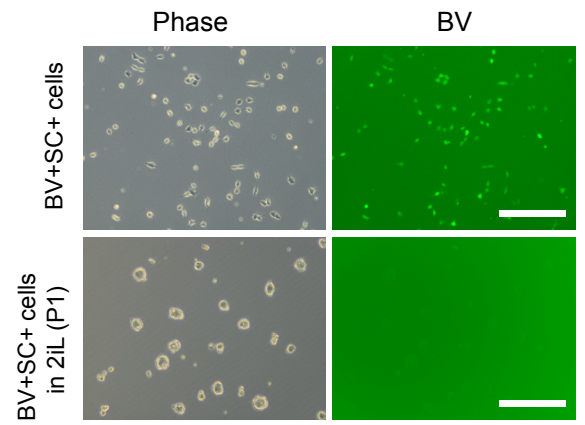**c**

| Injected cells     | Transferred embryos | Live pups | Chimeras (%) |
|--------------------|---------------------|-----------|--------------|
| BV+SC+             | 30                  | 8         | 1 (12.5)     |
| BV+SC+ in 2iL (P1) | 40                  | 9         | 6 (66.7)     |

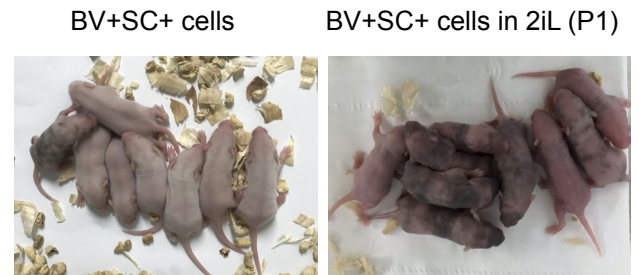**d**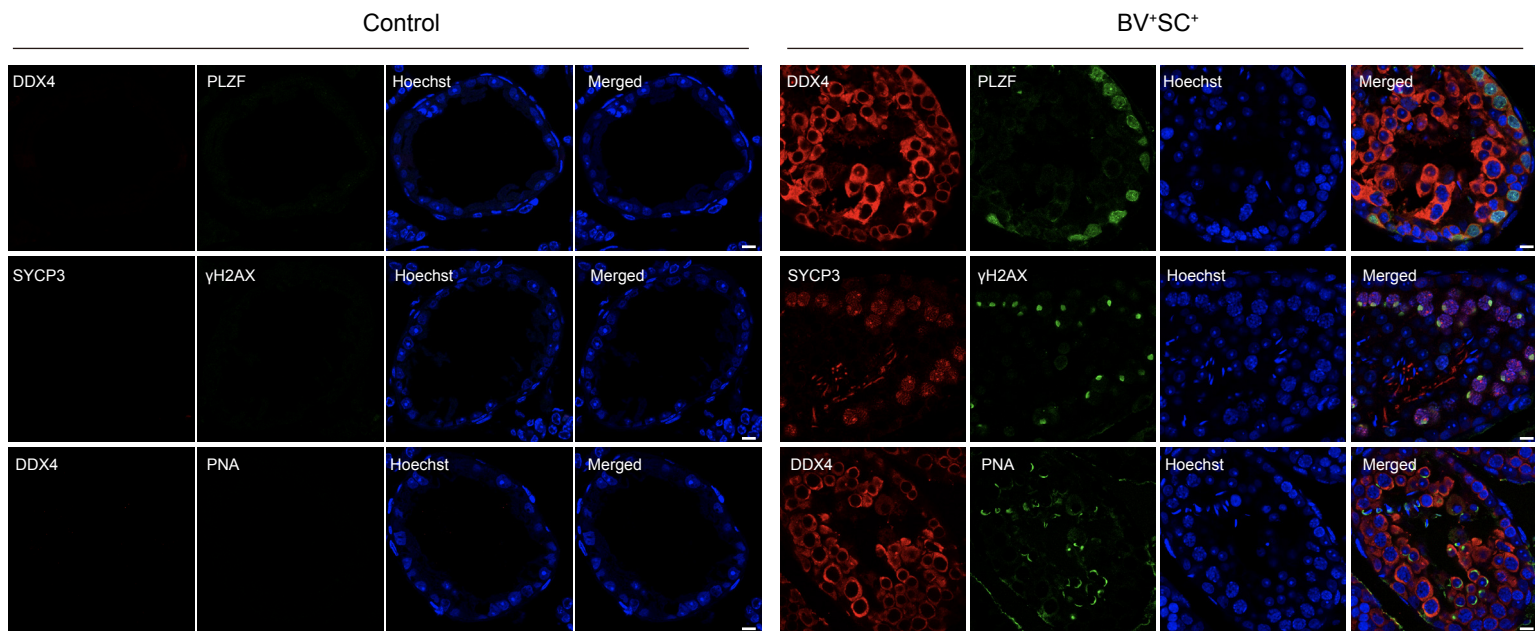

**Supplementary Fig. 4 Characterization of BV<sup>+</sup>SC<sup>+</sup> cells.** **a** Expression of *Dnmt3a*, *Dnmt3b* and *Uhrf1* in EpiSC, BV<sup>+</sup>SC<sup>+</sup> cells and ESC. Data are mean ± s.d., n=3 independent experiments. **b** BV is expressed in sorted BV<sup>+</sup>SC<sup>+</sup> cells but not in formed colonies after incubation with 2iL medium for 1 passage (P1). Scale bars, 250 μm. **c** Capacity of BV<sup>+</sup>SC<sup>+</sup> cells or BV<sup>+</sup>SC<sup>+</sup> cells cultured with 2iL medium for 1 passage (P1) to contribute to chimeras. **d** Representative images showing the spermatogonia (DDX4 and PLZF double-positive cells), spermatocytes (SYCP3 and γH2AX double-positive cells) and spermatids (DDX4 and PNA double-positive cells) in testis sections from *W/W<sup>v</sup>* mice that was transplanted with BV<sup>+</sup>SC<sup>+</sup> cells, but not from control *W/W<sup>v</sup>* mice. Scale bars, 10 μm. Source data are provided as a Source Data file.



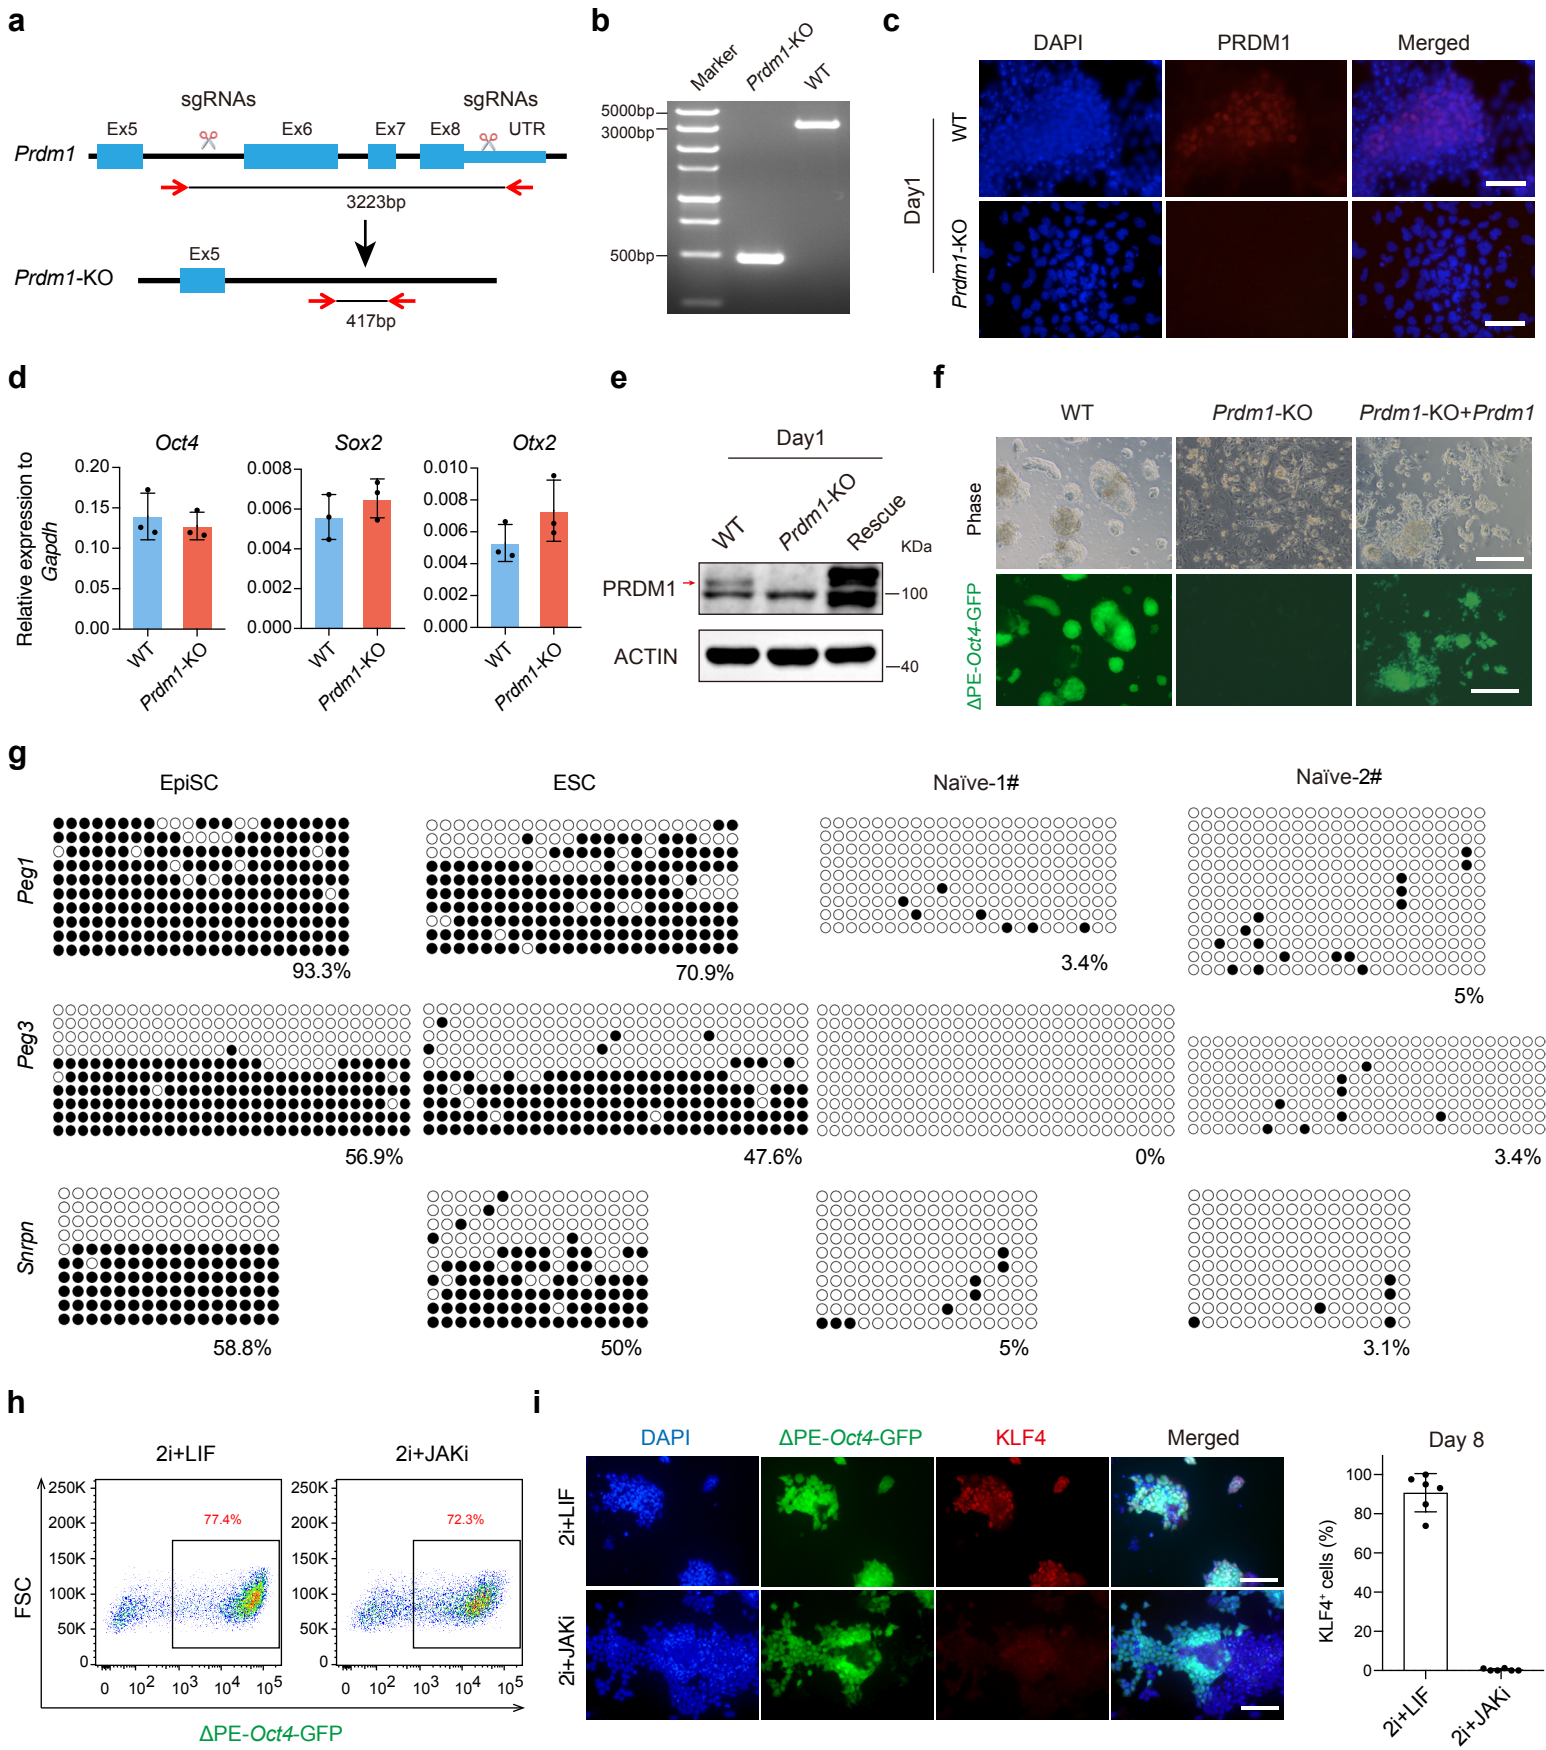

**Supplementary Fig. 5 *Prdm1* deficient cells fail to enter PGCLC and naïve pluripotent state.**

**a** Scheme showing the strategy used to generate *Prdm1* knockout EpiSCs. **b** *Prdm1*-KO EpiSCs were genotyped using primers indicated in **a**. **c** Immunofluorescence analysis confirms the deficiency of PRDM1 protein at Day 1 *Prdm1*-KO cells of BiPNT. Scale bar, 50  $\mu\text{m}$ . **d** RT-qPCR analysis for expression of primed pluripotency genes in WT and *Prdm1*-KO EpiSCs. Data are mean  $\pm$  s.d., n=3 independent experiments. **e** Western blot analysis of PRDM1 protein in WT, *Prdm1*-KO and rescue cells at Day 1 of BiPNT. **f** *Prdm1* knockout failed to induce  $\Delta\text{PE-Oct4-GFP}^+$  cells. Scale bars, 250  $\mu\text{m}$ . The experiments were repeated independently three times with similar results. **g** Bisulfite sequencing of *Peg1*, *Peg3* and *Snrpn* imprinted loci in EpiSC, ESC and two naïve colonies derived from BiPNT. **h** FACS analysis of  $\Delta\text{PE-Oct4-GFP}^+$  cells at Day 8 of BiPNT under 2i+LIF or 2i+JAKi (Jak inhibitor I, 5  $\mu\text{M}$ ) condition. **i** Left: Immunofluorescence analysis of KLF4 in  $\Delta\text{PE-Oct4-GFP}^+$  cells derived from the conditions as **h**. Scale bars, 100  $\mu\text{m}$ . Right: Percentage of KLF4<sup>+</sup> cells in  $\Delta\text{PE-Oct4-GFP}^+$  cells. Data are mean  $\pm$  s.d., n=6 microscope fields. The experiments in **b-c**, **e-f** were performed twice with similar results. Source data are provided as a Source Data file.

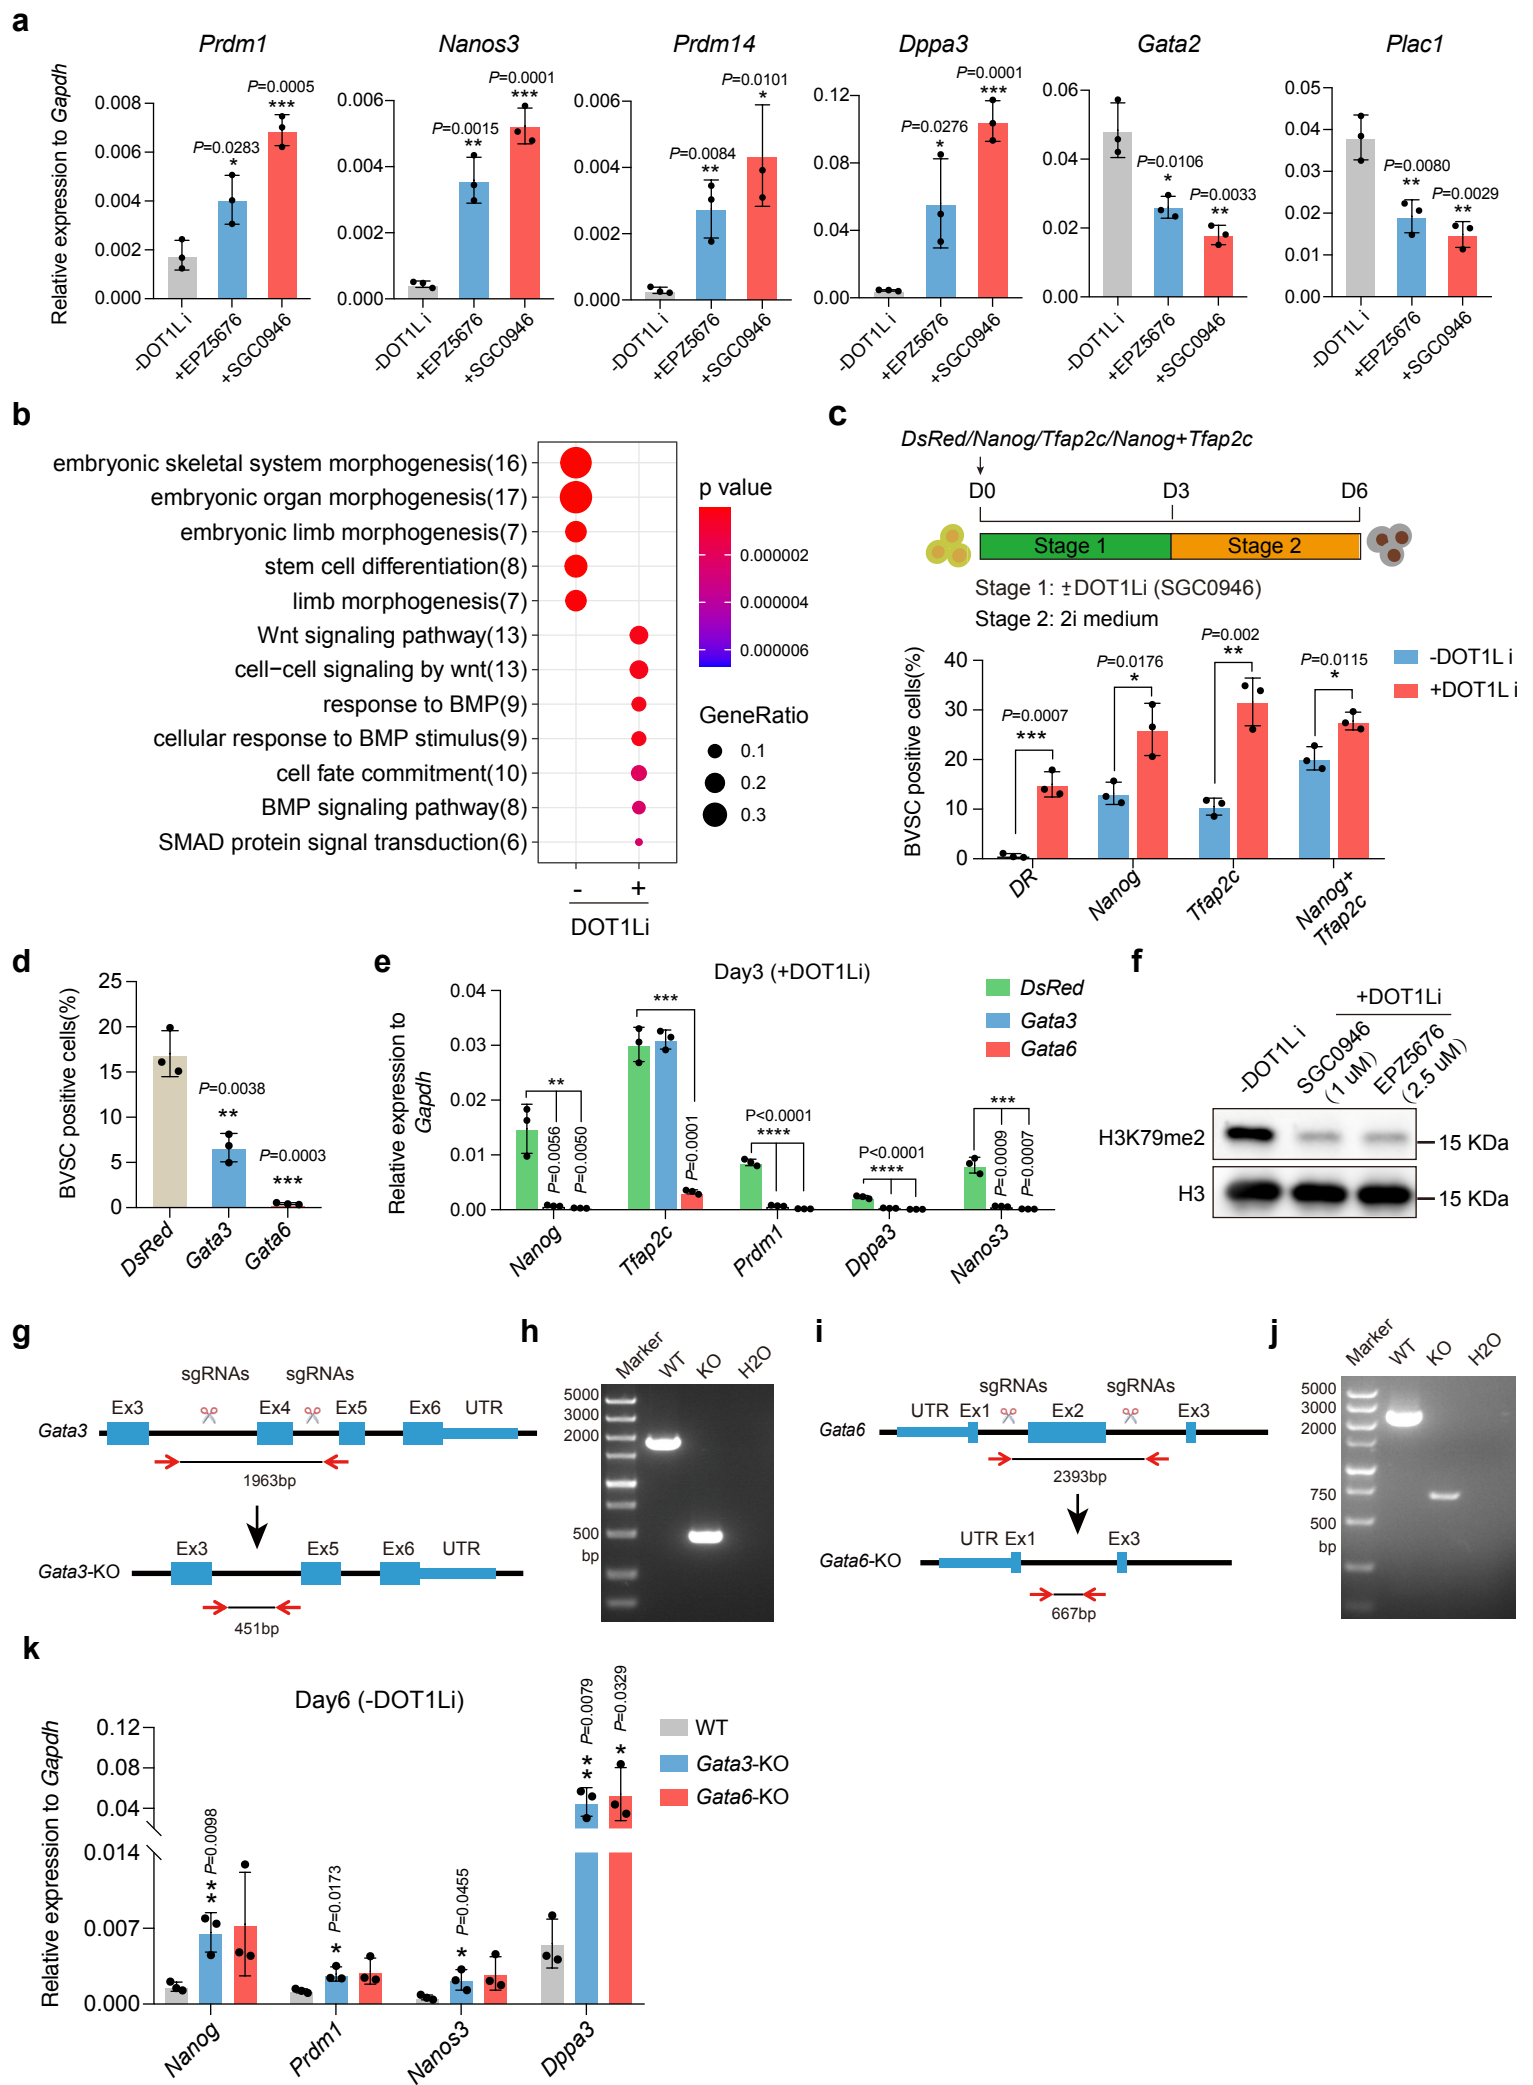

**Supplementary Fig. 6 DOT1L inhibition promotes the generation of PGCLCs.** **a** RT-qPCR analysis for expression of indicated genes at Day 6 of BiPNT with or without treatment of DOT1Li (EPZ5676 and SGC0946). Data are mean  $\pm$  s.d., two-tailed, unpaired student's *t*-test, n=3 independent experiments. \**p* < 0.05, \*\**p* < 0.01, \*\*\**p* < 0.001. **b** GO analysis of the genes that are down-regulated or up-regulated by DOT1Li (SGC0946). **c** Upper: schematic of experimental approach. Lower: percentage of BVSC positive cells at Day 6 induced in *DsRed*, *Nanog*, *Tfap2c* or *Nanog+Tfap2c* over-expressed cells with or without DOT1Li (SGC0946) treatment. Data are mean  $\pm$  s.d., two-tailed, unpaired student's *t*-test, n=3 independent experiments. \**p* < 0.05, \*\**p* < 0.01, \*\*\**p* < 0.001. **d** Percentage of BVSC positive cells at Day 6 induced in *DsRed*, *Gata3* or *Gata6* over-expressed cells with DOT1Li (SGC0946) treatment. Data are mean  $\pm$  s.d., two-tailed, unpaired student's *t*-test, n=3 independent experiments. \*\**p* < 0.01, \*\*\**p* < 0.001. **e** RT-qPCR analysis for expression of PGC related genes at Day 3 of DOT1Li (SGC0946) mediated BiPNT after over-expression of *Gata3* or *Gata6*. Data are mean  $\pm$  s.d., two-tailed, unpaired student's *t*-test, n=3 independent experiments. \*\**p* < 0.01, \*\*\**p* < 0.001. **f** DOT1Li (EPZ5676 and SGC0946) resulted in the reduction of H3K79me2 level as measured by western blot. **g** Scheme showing the strategy used to generate *Gata3*-KO EpiSC. **h** *Gata3*-KO EpiSC was genotyped using primers indicated in **g**. **i** Scheme showing the strategy used to generate *Gata6*-KO EpiSC. **j** *Gata6*-KO EpiSC was genotyped using primers indicated in **i**. **k** RT-qPCR analysis for expression of PGC related genes at Day 6 of BiPNT in *Gata3*-KO or *Gata6*-KO cells. Data are mean  $\pm$  s.d., two-tailed, unpaired student's *t*-test, n=3 independent experiments. \**p* < 0.05, \*\**p* < 0.01. The experiments in **f**, **h**, **j** were performed twice with similar results. Source data are provided as a Source Data file.

**a**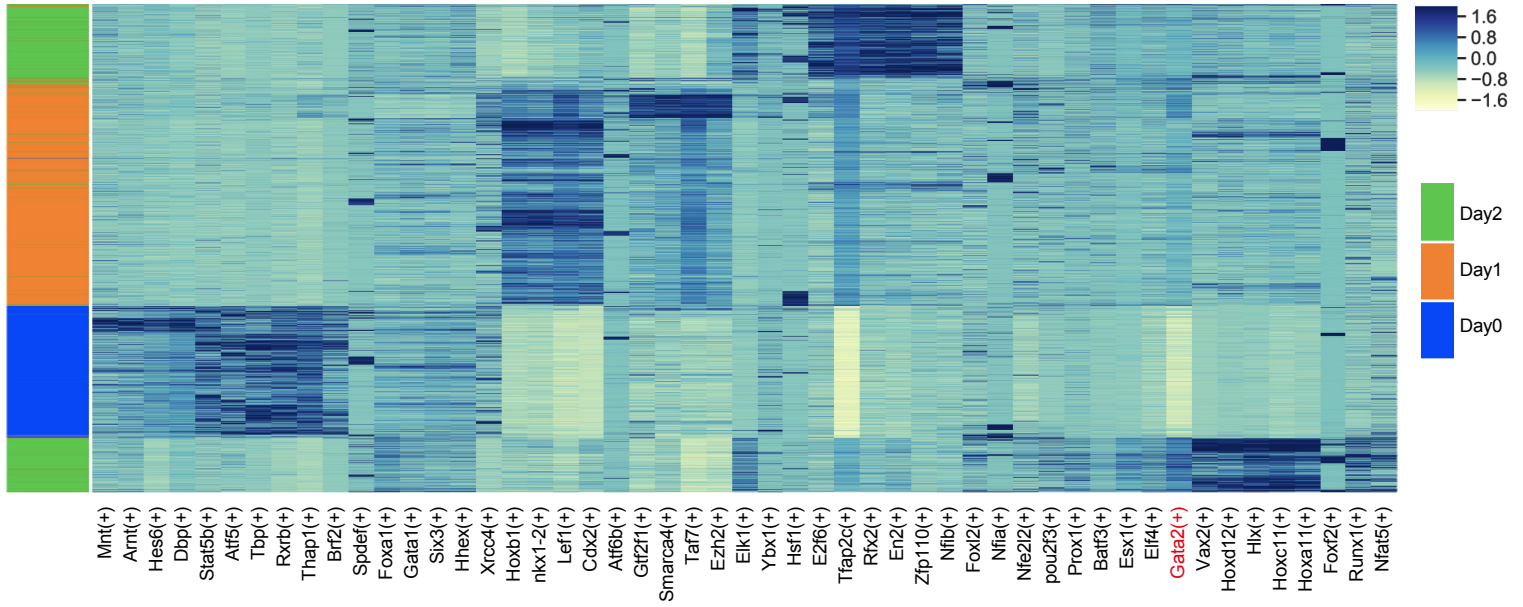**b**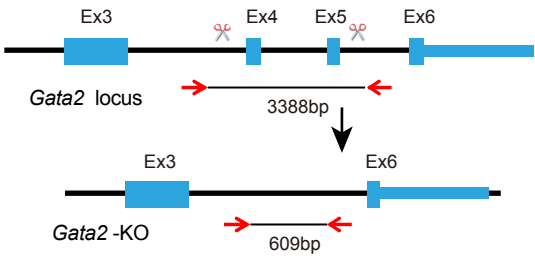**c**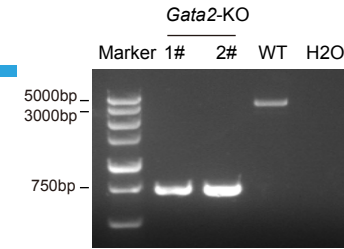**d**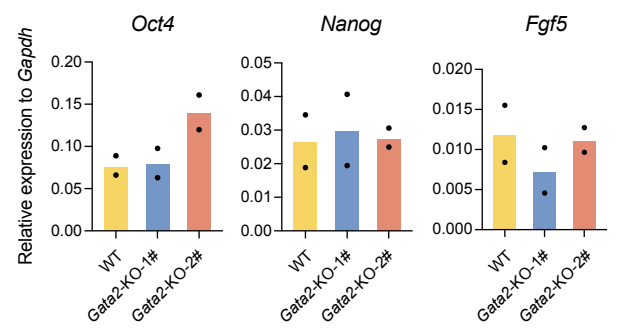**e**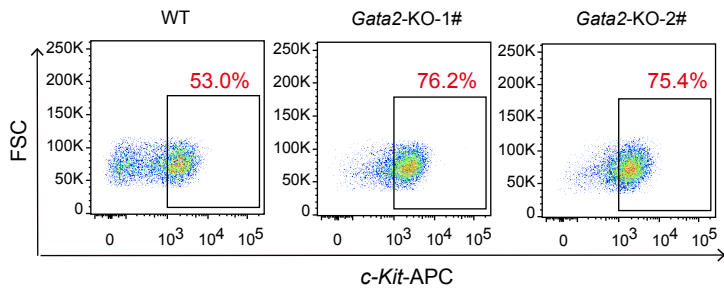**f**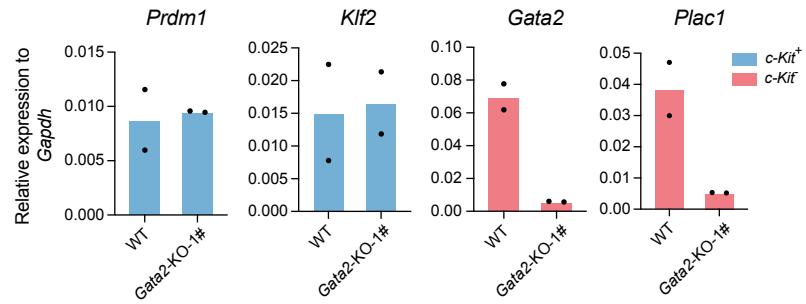

**Supplementary Fig. 7 Deficiency of *Gata2* arrests trophoblast fate, but promotes PGCLCs.**

**a** Regulon activity analyzed by pySCENIC during first three days, Day 0, Day 1 and Day 2. **b** Scheme showing the strategy used to generate *Gata2* knockout EpiSCs. **c** *Gata2* knockout cells were genotyped using primers indicated in **b**. The experiments were performed twice with similar results. **d** RT-qPCR analysis for expression of primed pluripotency related genes in WT and *Gata2*-KO EpiSCs. Data are mean  $\pm$  s.d., n=2 independent experiments. **e** *Gata2*-KO cells were sorted for *c-Kit* with FACS. **f** RT-qPCR analysis for expression of indicated genes in *c-Kit*<sup>+</sup> or *c-Kit*<sup>-</sup> cells sorted from WT and *Gata2* knockout samples. Data are mean  $\pm$  s.d., n=2 independent experiments. Source data are provided as a Source Data file.

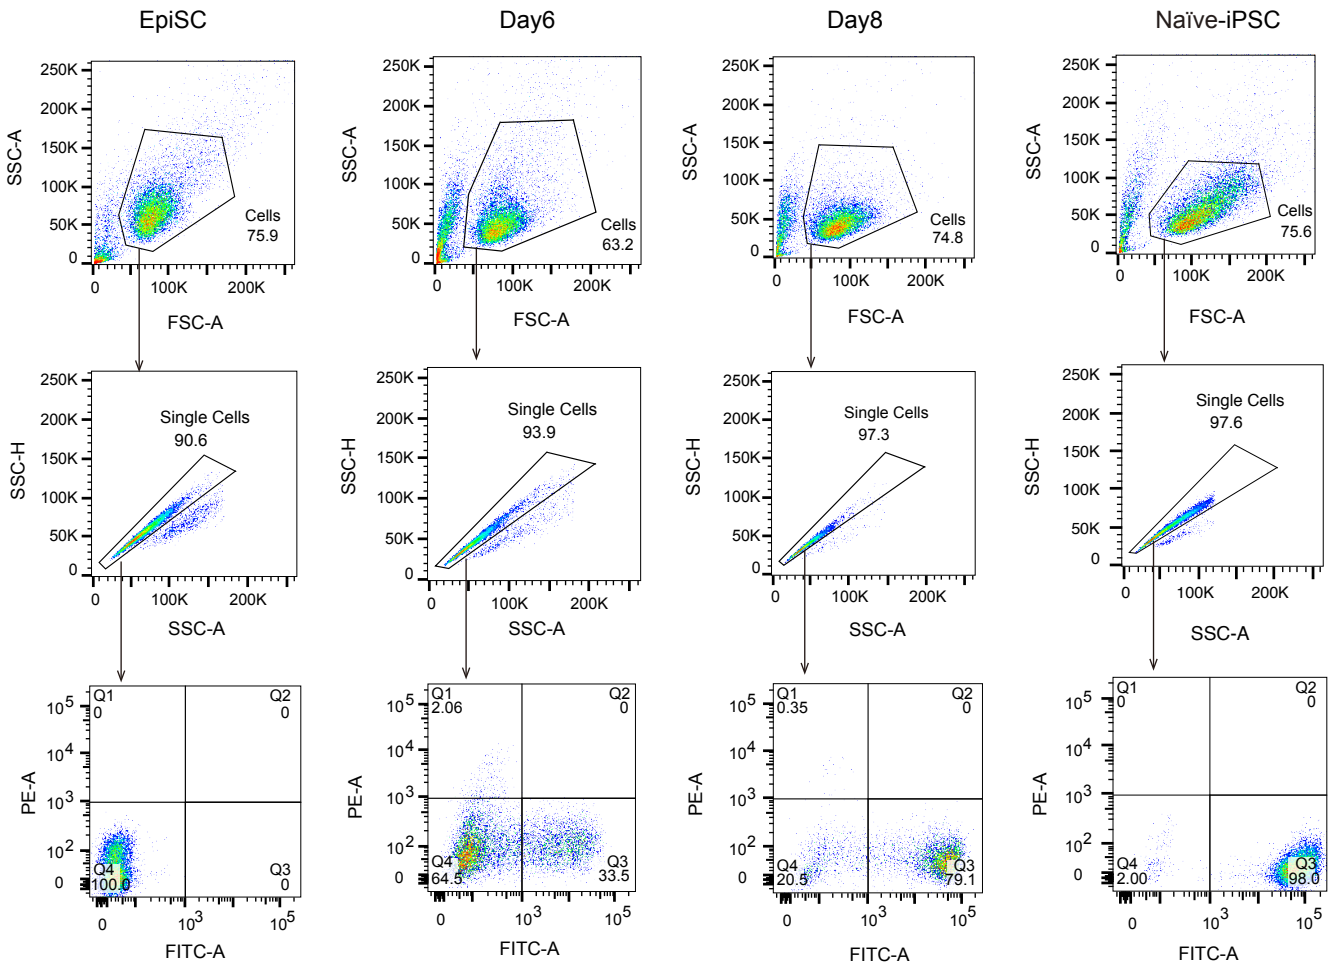

**Supplementary Fig. 8** The sequential gating strategy for FACS analysis in Supplementary Fig. 1b. FACS analysis of  $\Delta$ PE-*Oct4*-GFP or *Gata2*-tdTomato positive cells during BiPNT.

Original uncropped western blots

Fig. 4c

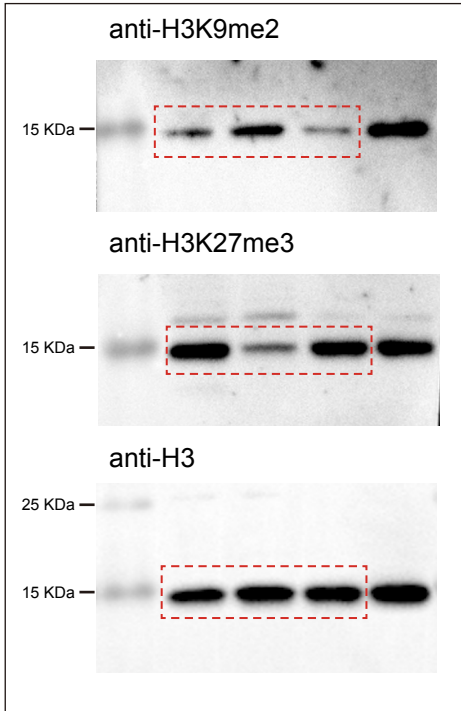

Supplementary Fig. 5e

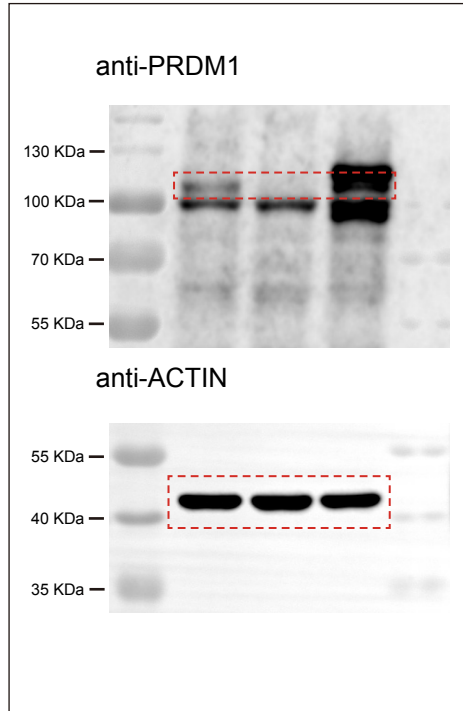

Supplementary Fig. 6f

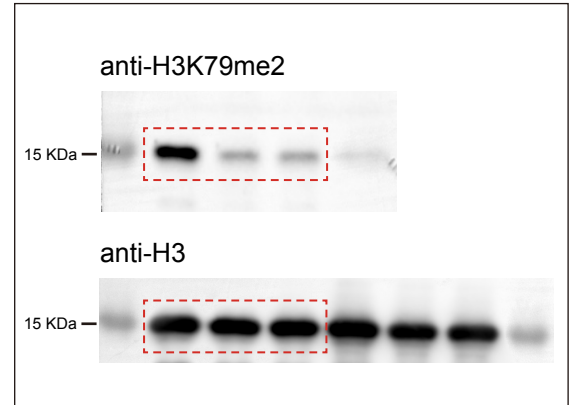

Supplementary Fig. 9 Uncropped western blot images
