# Supplementary material for: BMP4 drives primed to naïve transition through PGC-like state
Source: PubMed Central journal article supplement (PMC9120449; doi:10.1038/s41467-022-30325-4), 2022-05-19
Supplement: 41467_2022_30325_MOESM3_ESM.pdf [file 41467_2022_30325_MOESM3_ESM.pdf]

### **Description of Additional Supplementary Files**

File Name: Supplementary Data 1

Description: Primers for RT-qPCR used in this research.

File Name: Supplementary Data 2

Description: Primers for CRISPR/Cas9 used in this research.

File Name: Supplementary Data 3

Description: Primers for Bisulfite Sequencing used in this research.
